# Supplementary material for: Far-red imaging of β-galactosidase through a phospha-fluorescein
Source: Royal Society of Chemistry journal article supplement (doi:10.1039/d0cc05529h), 2020-01-01
Supplement: d0cc05529h1.pdf [file d0cc05529h1.pdf]

## Far-red imaging of $\beta$ -galactosidase through a phospho-fluorescein

Zichao Ding,<sup>†a</sup> Chuanfeng Wang,<sup>†b</sup> Mengting Fan,<sup>b</sup> Mengyuan Zhang,<sup>b</sup> Yao Zhou,<sup>b</sup>  
Xiaoyan Cui<sup>\*b</sup> Dazhi Zhang<sup>\*a</sup> and Ting Wang<sup>\*a</sup>

<sup>a</sup> *College of Pharmacy, Second Military Medical University, Shanghai, 200433, P.R. China*

*E-mail: wangting1983927@gmail.com, zdzhang\_yjhx@smmu.edu.cn*

<sup>b</sup> *Department of Chemistry, School of Chemistry and Molecular Engineering, East China Normal University, Shanghai, 200241, P.R. China*

*E-mail: xycui@chem.ecnu.edu.cn.*

<sup>†</sup>*Both authors contributed equality to this work.*

## 1. General Methods.

**Materials.** General chemicals were of the best grade available, supplied by Adamas-beta, Shanghai Chemical Reagent Co., Tokyo Chemical Industries (TCI), J&K chemical LTD., and Acros Organics. Unless otherwise stated, all commercial reagents were used without additional purification. All solvents were freshly distilled according to standard procedures prior to use.

**Apparatus.** All reactions were monitored by thin-layer chromatography (TLC) on gel F254 plates. Flash chromatography was carried out on silica gel (200-300 mesh; Qingdao Ocean Chemicals). The condensation reactions were performed in sealable pressure tubes (Beijing Synthware Glass) behind a blast shield. NMR spectra were recorded on a Bruker AC-300P spectrometer at 300 MHz for  $^1\text{H}$  NMR and at 75 MHz for  $^{13}\text{C}$  NMR or on a Bruker AC-600P spectrometer at 600 MHz for  $^1\text{H}$  NMR and at 150 MHz for  $^{13}\text{C}$  NMR.  $\delta$  values are given in ppm relative to tetramethylsilane. Mass spectra (MS) were measured with an API-3000 MS spectrometer using electrospray ionization (ESI). High-resolution mass spectra (HRMS) were recorded on an Agilent Technologies 6538 UHD Accurate-Mass Q-TOF MS spectrometer using ESI. UV-visible spectra were obtained on a Analytikjena Specord 210 PLUS UV-vis spectrophotometer. Fluorescence spectroscopic studies were performed on a Hitachi F-7000. HPLC analysis was performed on an Diamonsil C18 ( $4.6 \times 250$  mm) column (Dikma technologies) using an HPLC system composed of a pump (LC-20AD, Shimadzu) and a detector (SPD-M20A, Shimadzu).

## Synthesis of DiMe-PF and DiMe-PF-Gal.

**Compound 1.** Compound **1** was synthesized according to reported procedures.

**DiMe-PF.** To a 50 mL well-dried flask flushed with argon, 2-bromo-1,3-dimethylbenzene (0.28 g, 1.5 mmol) and anhydrous THF (5 mL) were added. The solution was cooled to -78 °C, *s*-BuLi (1.0 M in *n*-hexane, 2.0 mL, 2.0 mmol) was added and the reaction mixture was stirred at -78 °C for 30 min. Compound **1** (0.56 g, 1.0 mmol) dissolved in anhydrous THF (5 mL) was added dropwise, and the reaction mixture was slowly warmed to room temperature, then stirred for 1 h. The reaction was quenched by addition of 2 N HCl, then neutralized with NaHCO<sub>3</sub> and extracted with DCM. The organic layers were combined, washed with brine and dried over anhydrous Na<sub>2</sub>SO<sub>4</sub>. After filtration and removal of the solvent under reduced pressure, the residue was dissolved in CH<sub>2</sub>Cl<sub>2</sub> (10 mL). To this solution, *p*-toluenesulfonic acid monohydrate (0.17 g, 1.0 mmol) was added and the resulting mixture was stirred at room temperature for 1h. After removal of the solvent under reduced pressure, the residue was purified by column chromatography on silica gel to afford orange solid **DiMe-PF** (0.18 g, 43% yield). <sup>1</sup>H NMR (600MHz, CDCl<sub>3</sub>): δ 7.58-7.49 (m, 3H), 7.39 (td, *J* = 7.9, 3.2 Hz, 2H), 7.32 (t, *J* = 7.6 Hz, 1H), 7.19 (dd, *J* = 12.1, 7.7 Hz, 2H), 6.90 (dd, *J* = 9.4, 6.8 Hz, 2H), 2.03 (s, 3H), 2.00 (s, 3H); <sup>13</sup>C NMR (125MHz, CDCl<sub>3</sub>): δ 152.2, 152.2, 138.6, 136.1, 135.2, 135.0, 134.1, 132.3, 132.3, 131.5, 129.7, 129.6, 128.8, 128.7, 128.5, 127.4, 127.4, 121.1, 119.8, 19.4, 19.4; <sup>31</sup>P NMR (240MHz, CDCl<sub>3</sub>): δ 10.75 (s). HRMS (ESI) calcd. for C<sub>27</sub>H<sub>21</sub>O<sub>3</sub>P [M+H]<sup>+</sup>: 425.1301, found: 425.1350.

**DiMe-PF-Gal.** A mixture of **DiMe-PF** (82 mg, 0.2 mmol), 2,3,4,6-tetra-O-acetyl- $\alpha$ -galactopyranosyl bromide (0.25 g, 0.6 mmol) and Cs<sub>2</sub>CO<sub>3</sub> (0.20 g, 0.6 mmol) in MeCN (5 mL) was stirred at room temperature under argon overnight. The inorganic precipitate was filtered off, and the filtrate was evaporated to dryness. The resulting residue was dissolved with dry MeOH (5 mL) and the solution was cooled to 0 °C.

Then 30  $\mu\text{L}$  of 28 % NaOMe in MeOH was slowly added, and the mixture was stirred for 1 h. The reaction was quenched by addition of 2 N HCl, then neutralized with  $\text{NaHCO}_3$  and extracted with DCM. The organic layers were combined, washed with brine and dried over anhydrous  $\text{Na}_2\text{SO}_4$ . After filtration and removal of the solvent under reduced pressure, the residue was purified by column chromatography on silica gel to afford **DiMe-PF-Gal** (48 mg, 41% yield).  $^1\text{H}$  NMR (600MHz,  $\text{CDCl}_3$ ):  $\delta$  7.71-7.65 (m, 1H), 7.57-7.46 (m, 2H), 7.37-7.26 (m, 4H), 7.21-7.11 (m, 3H), 6.98-6.77 (m, 3H), 6.32-6.20 (m, 1H), 4.99-4.86 (m, 1H), 4.11-3.86 (m, 2H), 3.67-3.49 (m, 4H), 1.93-1.90 (m, 6H);  $^{13}\text{C}$  NMR (125MHz,  $\text{CDCl}_3$ ):  $\delta$  183.4, 183.3, 159.3, 159.2, 159.1, 151.0, 138.4, 136.0, 135.8, 135.0, 134.9, 132.3, 131.5, 129.9, 129.8, 129.6, 128.8, 128.7, 128.6, 127.5, 125.0, 121.2, 100.3, 99.9, 74.8, 74.5, 73.0, 72.9, 70.2, 68.0, 60.5, 60.3, 19.4, 19.3, 19.3;  $^{31}\text{P}$  NMR (240MHz,  $\text{CDCl}_3$ ):  $\delta$  9.52 (s), 9.42 (s). HRMS (ESI) calcd. for  $\text{C}_{33}\text{H}_{31}\text{O}_8\text{P}$   $[\text{M}+\text{H}]^+$ : 587.1829, found: 187.1842.

### **Cellular culture**

HEK 293T cell (purchased from National Infrastructure of Cell Line Resource in Shanghai) were cultured in Dulbecco's Modified Eagle's Medium (DMEM) containing 10% fetal bovine serum (FBS) and 1% Antibiotic-Antimycotic (AA) at 37  $^\circ\text{C}$  in a 5%  $\text{CO}_2/95\%$  air incubator. Ovar-3 cell (purchased from National Infrastructure of Cell Line Resource in Shanghai) were cultured in RPMI 1640 containing 20% FBS and 1% Antibiotic-Antimycotic (AA) at 37  $^\circ\text{C}$  in a 5%  $\text{CO}_2/95\%$  air incubator.

### **MTT assay.**

The cytotoxicity of **DiMe-PF-Gal** were evaluated using MTT assay. HEK 293T cell lines and Ovar-3 cells were cultivated in 96-well plates by mixture of 90% (V/V) Dulbecco's Modified Eagle's Medium (DMEM), 10% (V/V) FBS containing probes of various concentrations: 1  $\mu\text{M}$ , 2  $\mu\text{M}$ , 5  $\mu\text{M}$ , 10  $\mu\text{M}$  and 20  $\mu\text{M}$  in a 5%  $\text{CO}_2/95\%$  air incubator at 37  $^\circ\text{C}$ . After incubation for 24 hours, 20  $\mu\text{L}$  of MTT reagent, 3-(4,5-

dimethylthiazol-2-yl)-2,5-diphenyltetrazolium bromide (5 mg/mL in PBS) was added into each well and incubated for another 4 hours in the 5% CO<sub>2</sub>/95% air incubator at 37 °C. Then 80 µL DMSO were added into each well to dissolve the formazan crystals. Each experiment was performed for three times. Absorbance of each well was analysed at 565 nm with a Synergy<sup>TM</sup> H1 multimode microplate reader (BioTek).

### ***LacZ* gene transient transfection**

HEK 293T cells were centrifuged and resuspended in fresh serum-free DMEM at a density of  $1.0 \times 10^6$  cells mL<sup>-1</sup> before transfection. 500 µL cell suspension was distributed per well in a 12-well plate. DNA was diluted in fresh serum-free DMEM (in a volume equivalent to one-tenth of the culture to be transfected), PEI was added, and the mixture immediately vortexed and incubated for 10 min at room temperature prior to its addition to the cells. Following a 3 h incubation with DNA-PEI complexes, culture medium was completed to 1 mL by the addition of DMEM supplemented with 10% FBS.

### **Confocal imaging.**

HEK 293T cell and Ovar-3 cell were incubated with **DiMe-PF-Gal** (5.0 µM) for 30 min and washed by PBS for three times. Fluorescent imaging was performed using Leica TCS SP5 confocal laser scanning microscopy with a 63× objective.

# <sup>1</sup>H NMR, <sup>13</sup>C NMR and <sup>31</sup>P NMR spectra

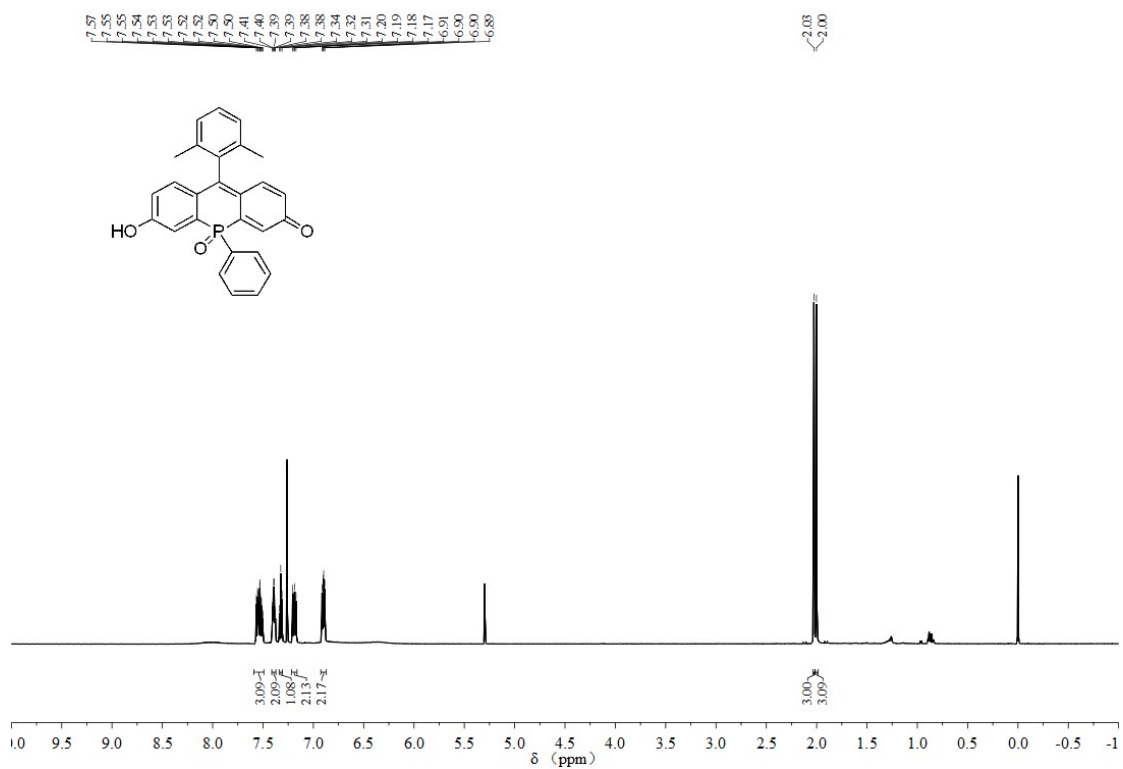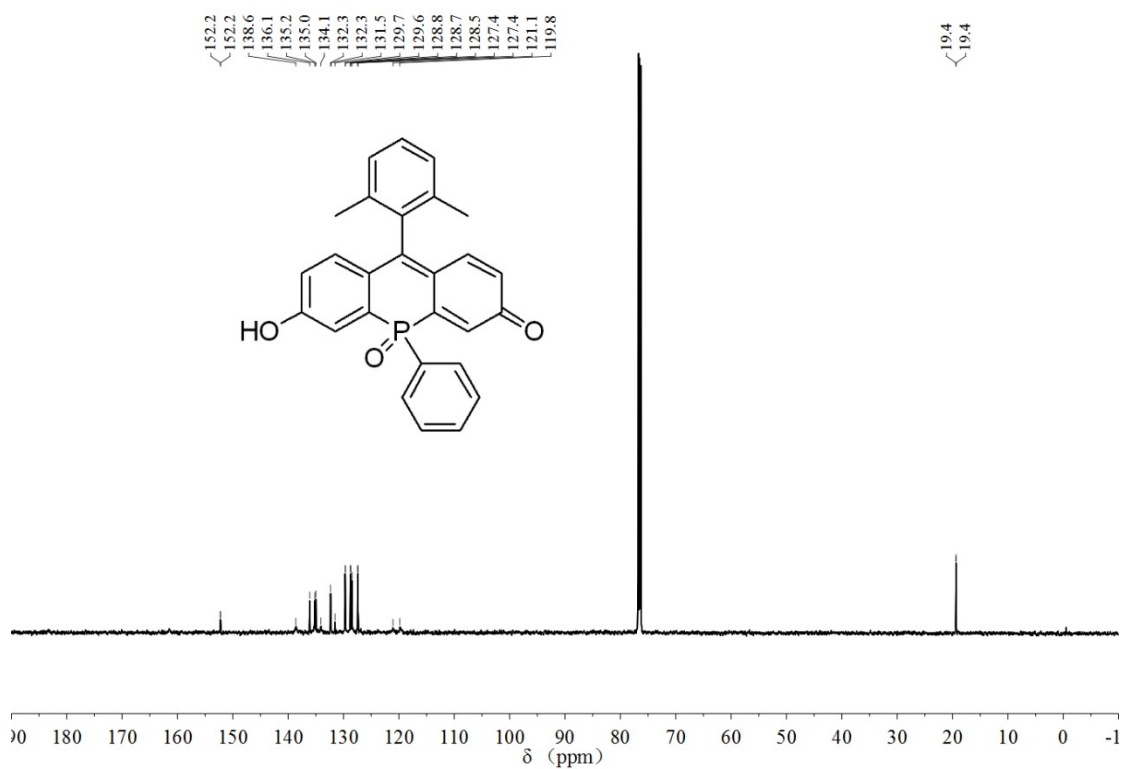

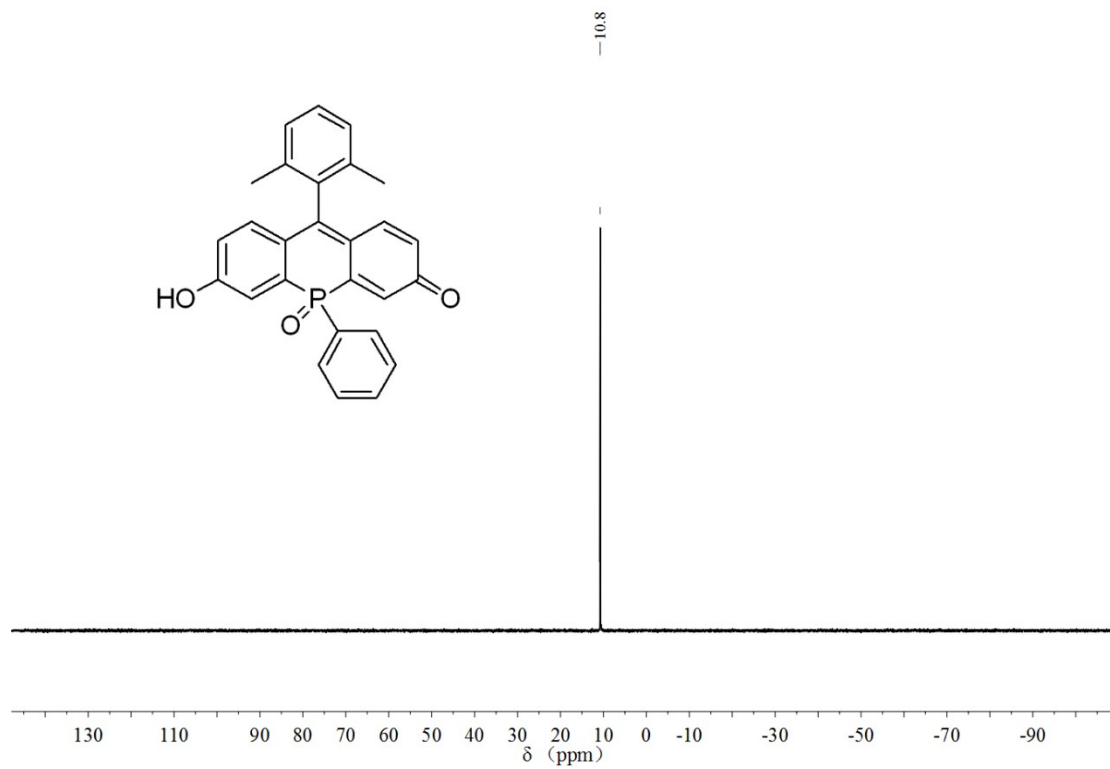

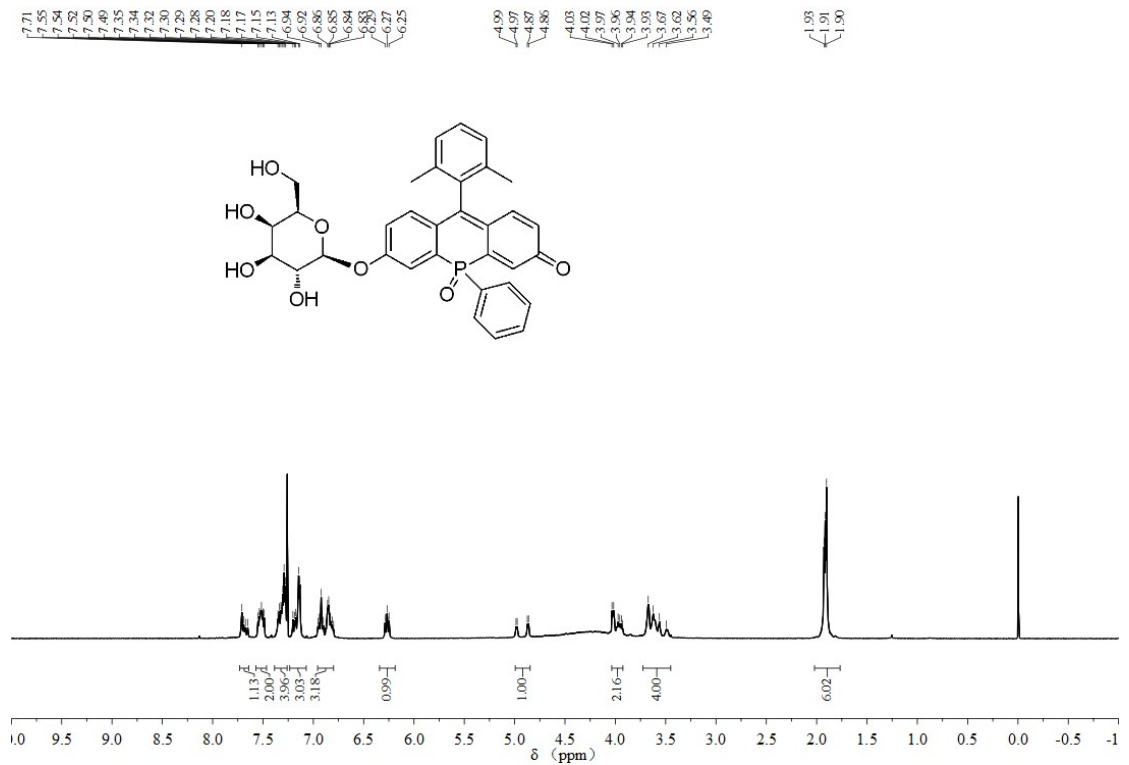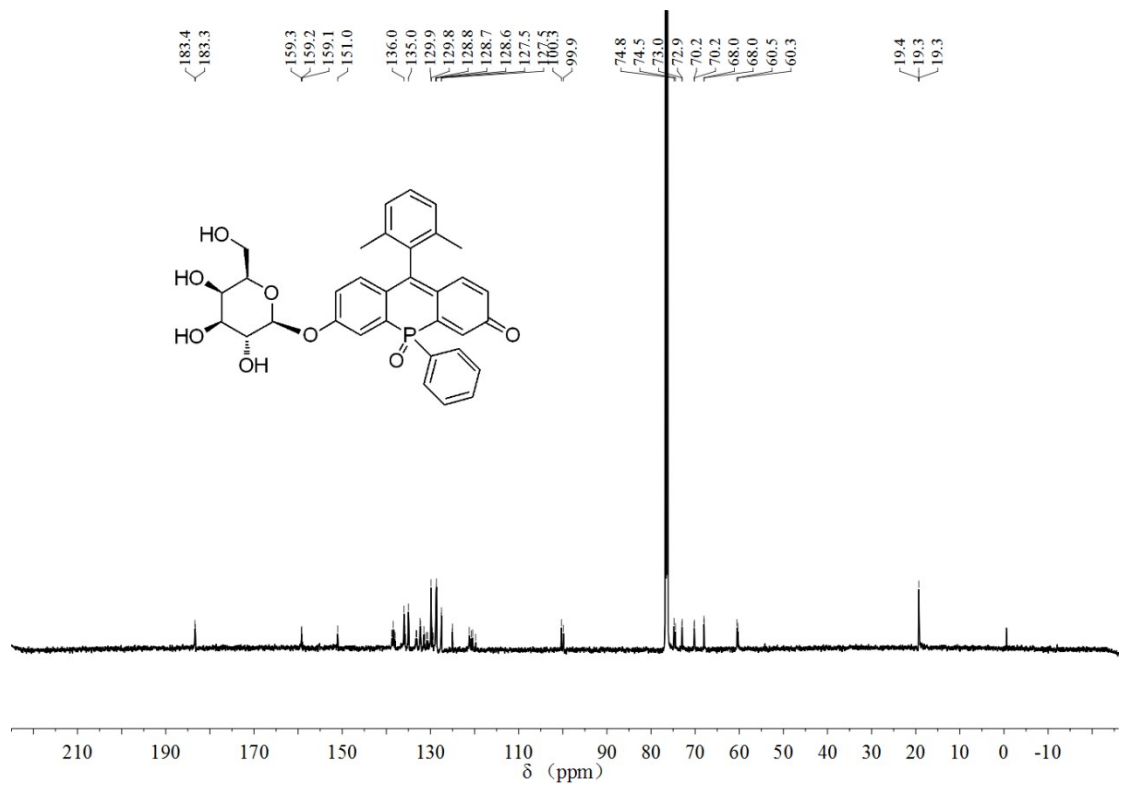



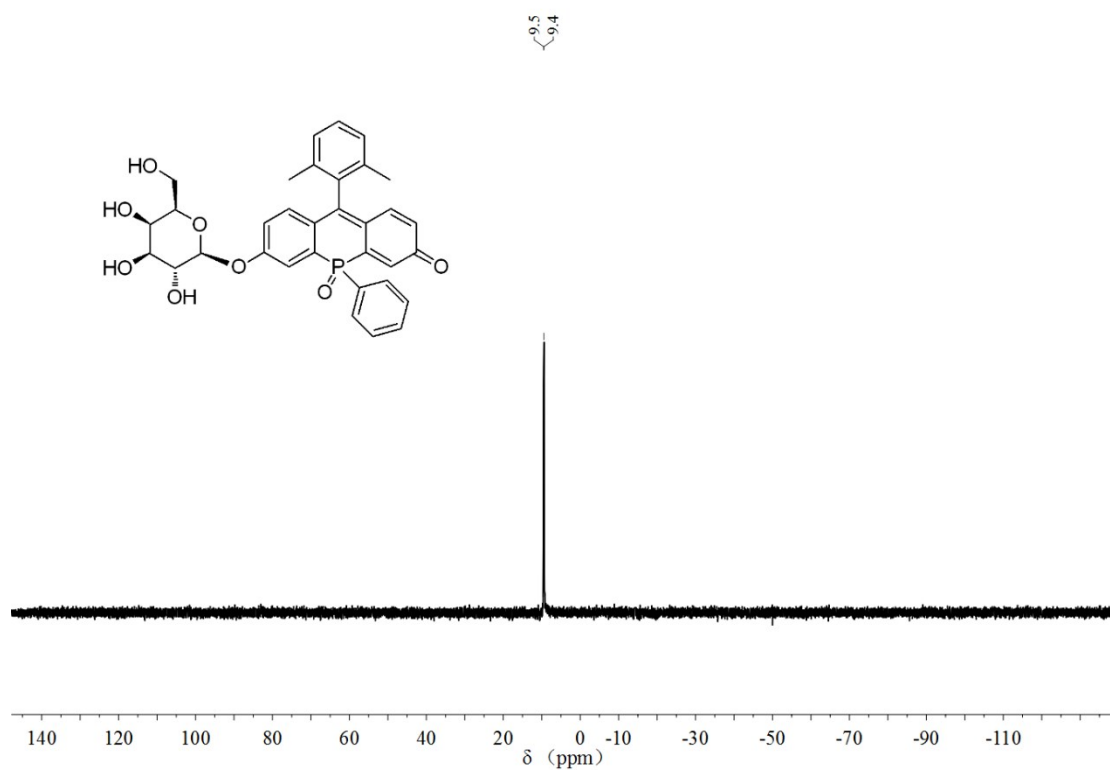

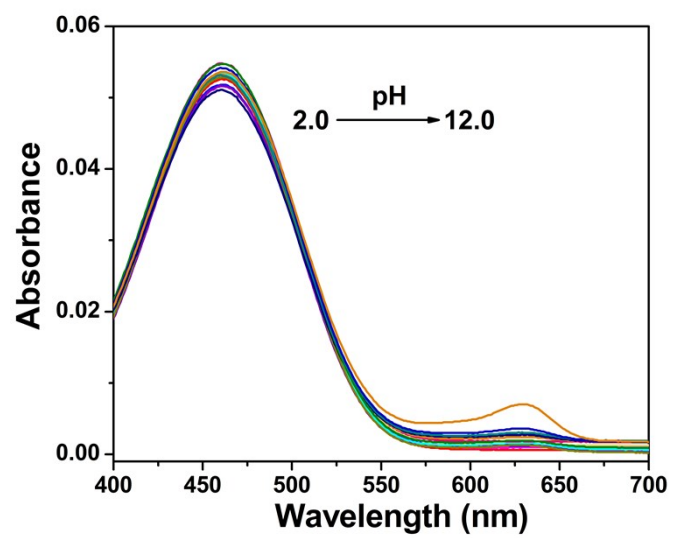

**Fig. S1** The absorption spectra of **DiMe-PF-Gal** in varied pH (2.5 μM).

**Table S1** The excited states and corresponding oscillator strength ( $f$ ) of **DiMe-PF**.

| Excited State | $f$    | Excited State | $f$    | Excited State | $f$    |
|---------------|--------|---------------|--------|---------------|--------|
| 1             | 0.0002 | 11            | 0.0854 | 21            | 0.0390 |
| 2             | 0.3885 | 12            | 0.0545 | 22            | 0.0190 |
| 3             | 0.0009 | 13            | 0.1193 | 23            | 0.0175 |
| 4             | 0.0004 | 14            | 0.0434 | 24            | 0.0070 |
| 5             | 0.0475 | 15            | 0.0059 | 25            | 0.0042 |
| 6             | 0.0003 | 16            | 0.0049 | 26            | 0.0054 |
| 7             | 0.0009 | 17            | 0.0276 | 27            | 0.0019 |
| 8             | 0.054  | 18            | 0.0012 | 28            | 0.0033 |
| 9             | 0.0228 | 19            | 0.0038 | 29            | 0.0247 |
| 10            | 0.0132 | 20            | 0.0001 | 30            | 0.0910 |

Excited State 2: Singlet-A 2.9571 eV 419.28 nm  $f=0.3885$   $\langle S^2 \rangle=0.000$   
107 -> 112 0.13292  
111 -> 112 0.67675

**Table S2** The excited states and corresponding oscillator strength ( $f$ ) of **DiMe-PF-Gal**.

| Excited State | $f$    | Excited State | $f$    | Excited State | $f$    |
|---------------|--------|---------------|--------|---------------|--------|
| 1             | 0.0003 | 11            | 0.0161 | 21            | 0.0050 |
| 2             | 0.4925 | 12            | 0.0875 | 22            | 0.0001 |
| 3             | 0.0013 | 13            | 0.0799 | 23            | 0.0016 |
| 4             | 0.0006 | 14            | 0.0013 | 24            | 0.0803 |
| 5             | 0.0533 | 15            | 0.0182 | 25            | 0.0008 |
| 6             | 0.0002 | 16            | 0.1068 | 26            | 0.0107 |
| 7             | 0.0008 | 17            | 0.0060 | 27            | 0.0008 |
| 8             | 0.0071 | 18            | 0.0030 | 28            | 0.0039 |
| 9             | 0.0251 | 19            | 0.0068 | 29            | 0.0060 |
| 10            | 0.0069 | 20            | 0.0254 | 30            | 0.0025 |

Excited State 2: Singlet-A 2.9608 eV 418.75 nm  $f=0.4925$   $\langle S^2 \rangle=0.000$   
 150 -> 155 -0.12310  
 154 -> 155 0.67701

**Table S3** The excited states and corresponding oscillator strength ( $f$ ) of deprotonated PF.

| Excited State | $f$    | Excited State | $f$    | Excited State | $f$    |
|---------------|--------|---------------|--------|---------------|--------|
| 1             | 0.000  | 11            | 0.0088 | 21            | 0.0024 |
| 2             | 0.0020 | 12            | 0.1968 | 22            | 0.0002 |
| 3             | 0.0033 | 13            | 0.0754 | 23            | 0.0031 |
| 4             | 0.0000 | 14            | 0.0022 | 24            | 0.0314 |
| 5             | 0.0040 | 15            | 0.0028 | 25            | 0.0140 |
| 6             | 0.0000 | 16            | 0.0105 | 26            | 0.0015 |
| 7             | 0.0001 | 17            | 0.0000 | 27            | 0.0027 |
| 8             | 0.0054 | 18            | 0.0636 | 28            | 0.0233 |
| 9             | 0.2302 | 19            | 0.0018 | 29            | 0.0012 |
| 10            | 0.0000 | 20            | 0.0009 | 30            | 0.0328 |

Excited State 9: Singlet-A 2.4662 eV 502.74 nm  $f=0.2302$   $\langle S^2 \rangle=0.000$   
 101 -> 111 0.43452  
 104 -> 111 0.53457  
 109 -> 112 0.13943  
 104 <- 111 -0.11102

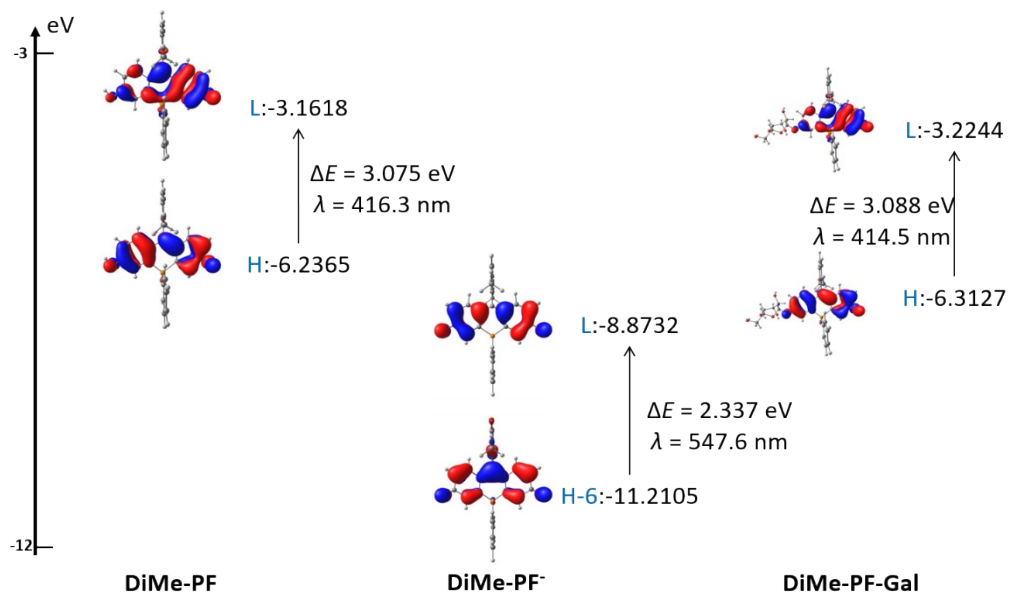

**Fig. S2** The dominated excited states of **DiMe-PF**, deprotonated **DiMe-PF** and **DiMe-PF-Gal**.

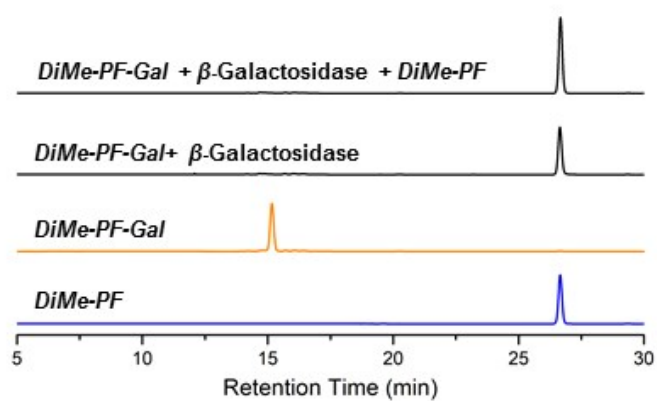

**Fig. S3** HPLC analysis of probe **DiMe-PF-Gal** reacted with  $\beta$ -galactosidase.

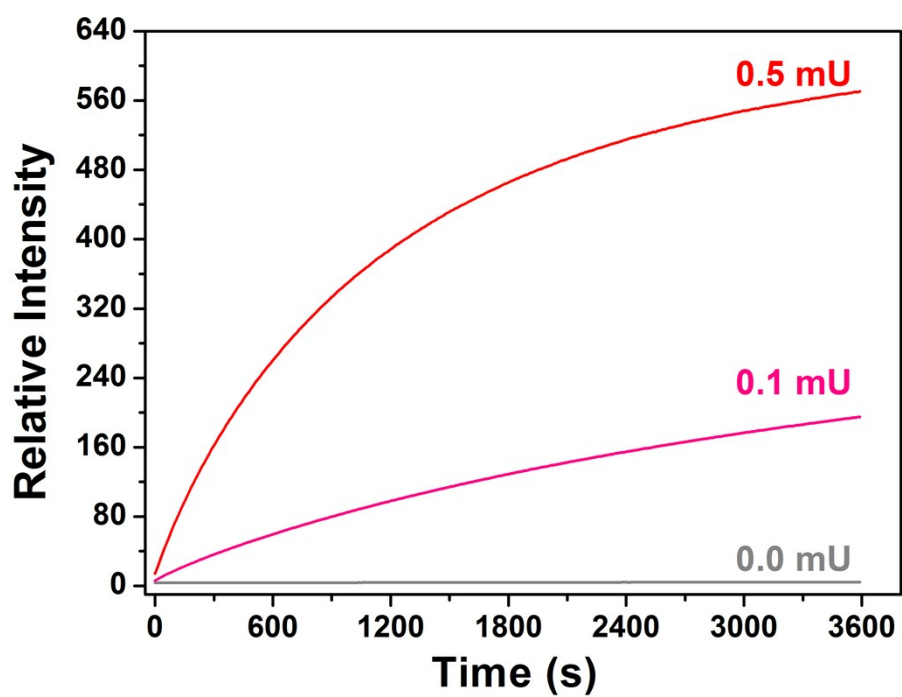

**Fig. S4** Time-dependent fluorescence intensity changes of probe **DiMe-PF-Gal** (2.5 μM) upon addition of various concentrations  $\beta$ -galactosidase.



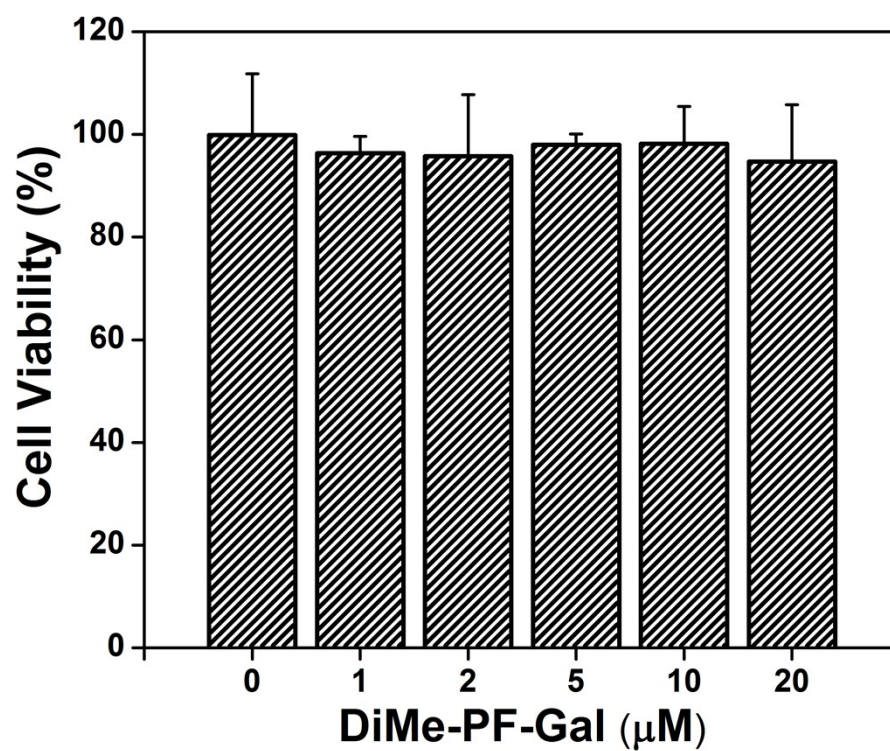

**Fig. S5** Cytotoxic effects of probe **DiMe-PF-Gal** on HEK 293T cells.

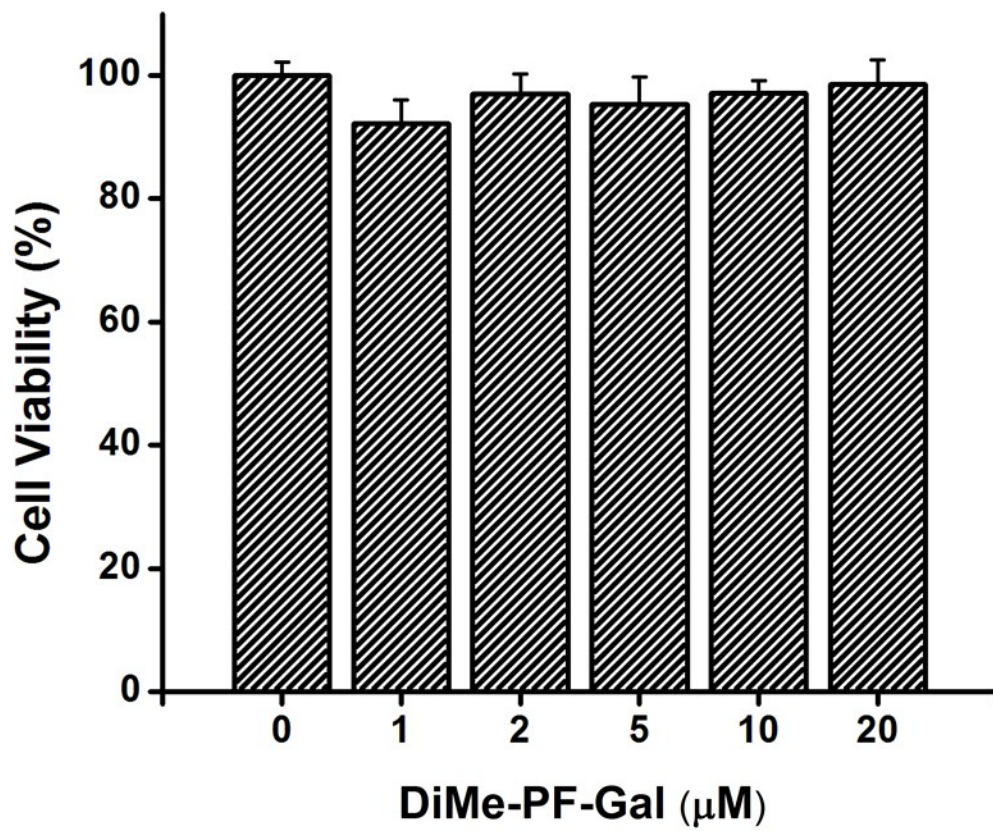

**Fig. S6** Cytotoxic effects of probe **DiMe-PF-Gal** on Ovar-3 cells.

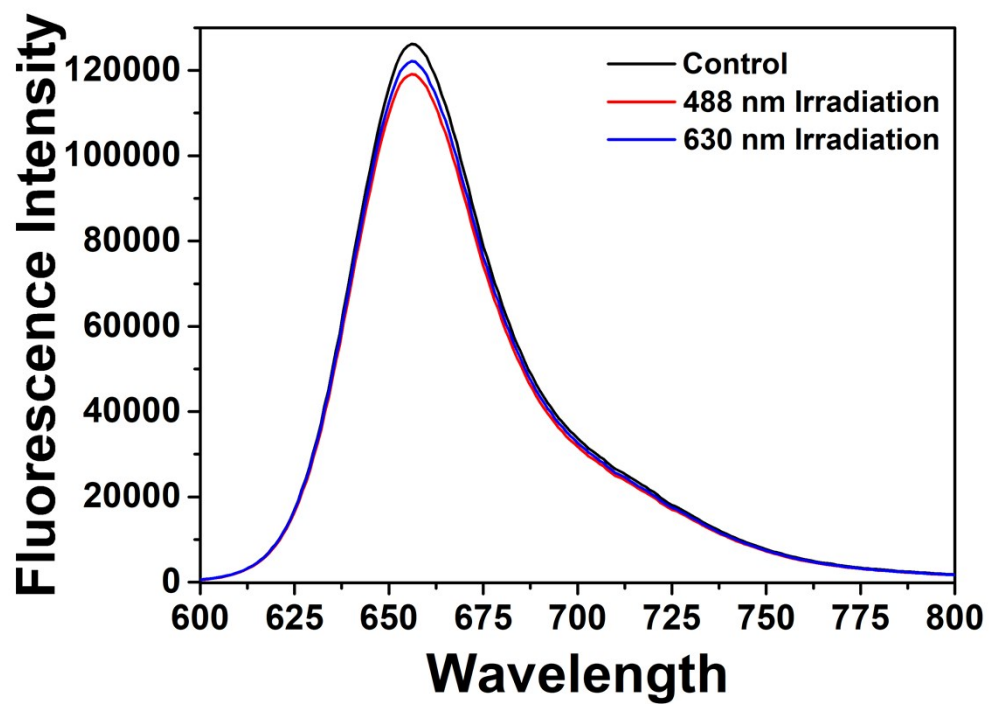

**Fig. S7** Intensity of fluorescence for **DiMe-PF-Gal** irradiated with light at 488 nm or 630 nm for 1 hour.

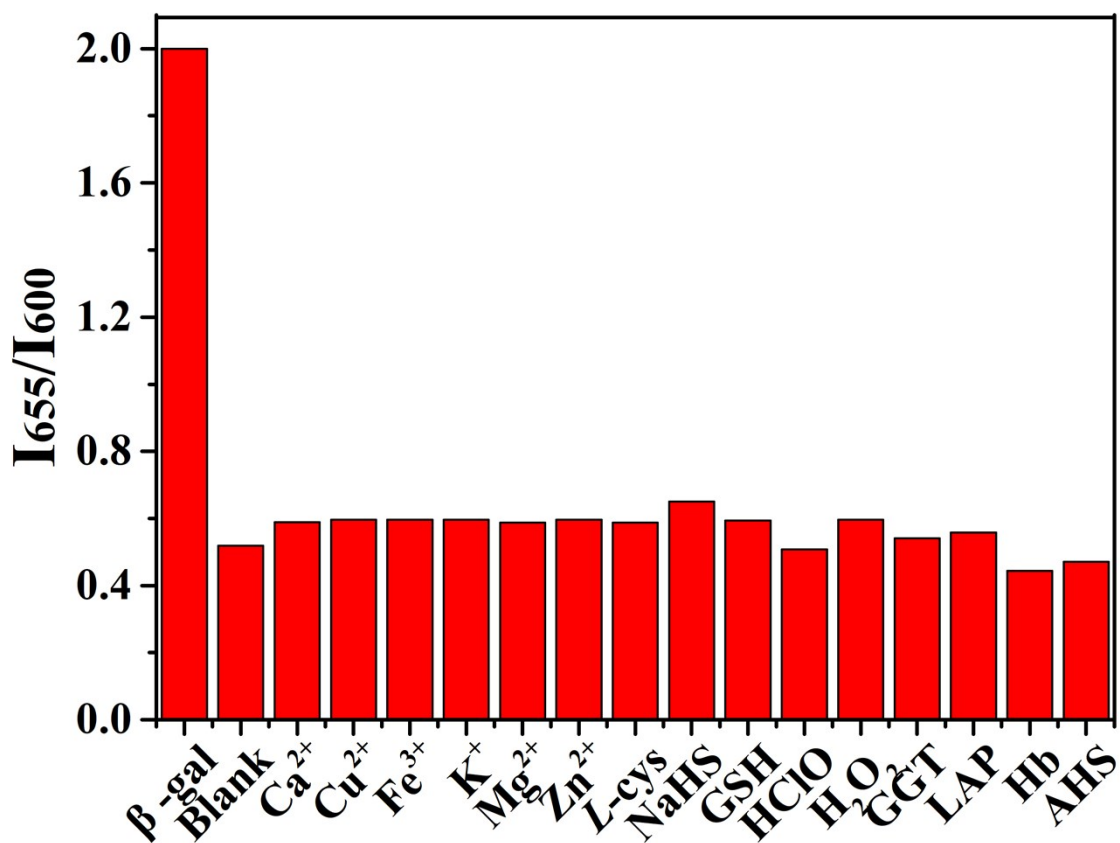

**Fig. 8** Fluorescence intensity of **DiMe-PF-Gal** in the presence of other species in PBS buffer solution at 7.4 (500  $\mu$ M for metal ions, L-cys, NaHS, GSH, HClO and H<sub>2</sub>O<sub>2</sub>, 200  $\mu$ U for  $\beta$ -Gal, GGT and LAP, 200  $\mu$ M for Hb and AHS).
